# Supplementary material for: 99mTc-labeling of ciprofloxacin and nitrofuryl thiosemicarbazone using fac-[99mTc(CO)3(H2O)3] core: evaluation of their efficacy as infection imaging agents
Source: Royal Society of Chemistry journal article supplement (doi:10.1039/c1mt00068c), 2011-01-01
Supplement: c1mt00068c.pdf [file c1mt00068c.pdf]

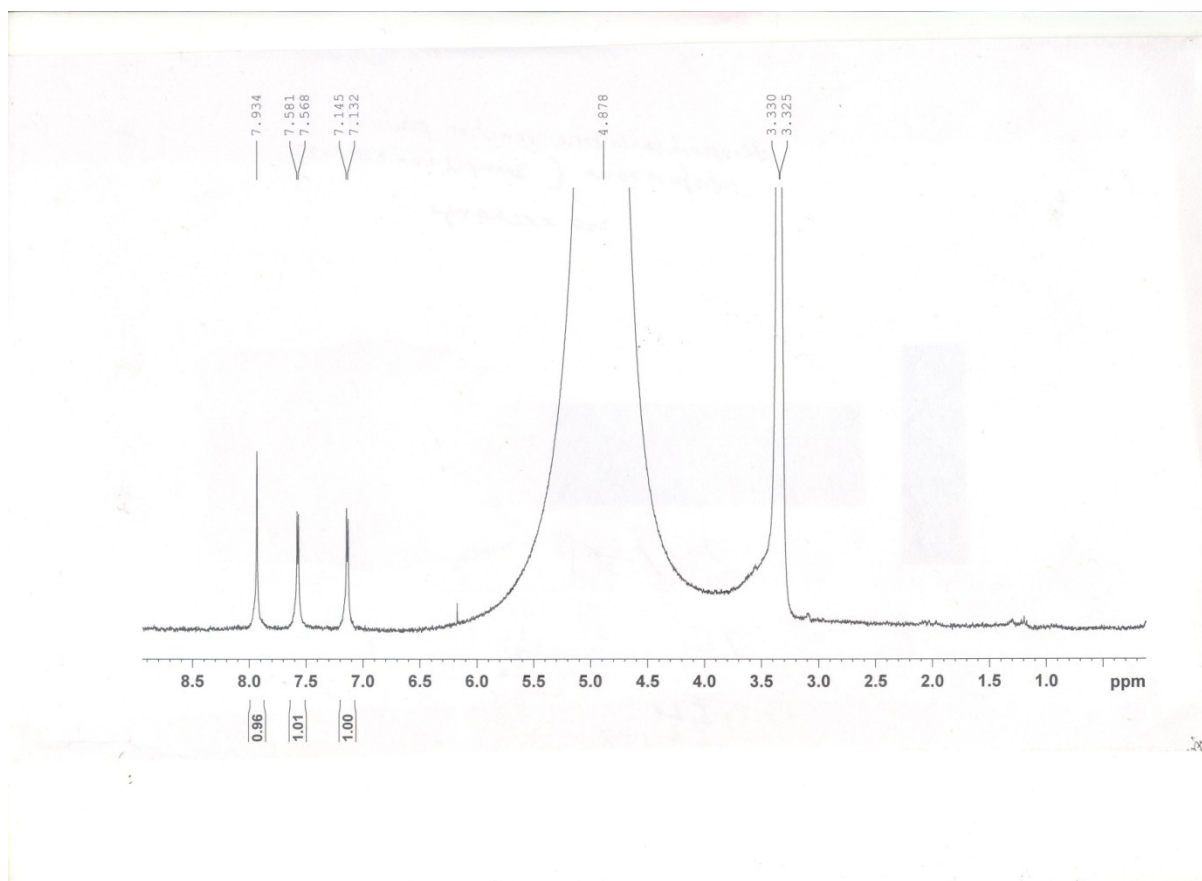

Fig.5 <sup>1</sup>H NMR spectra of 5-nitrofurfural-2-thiosemicarbazone

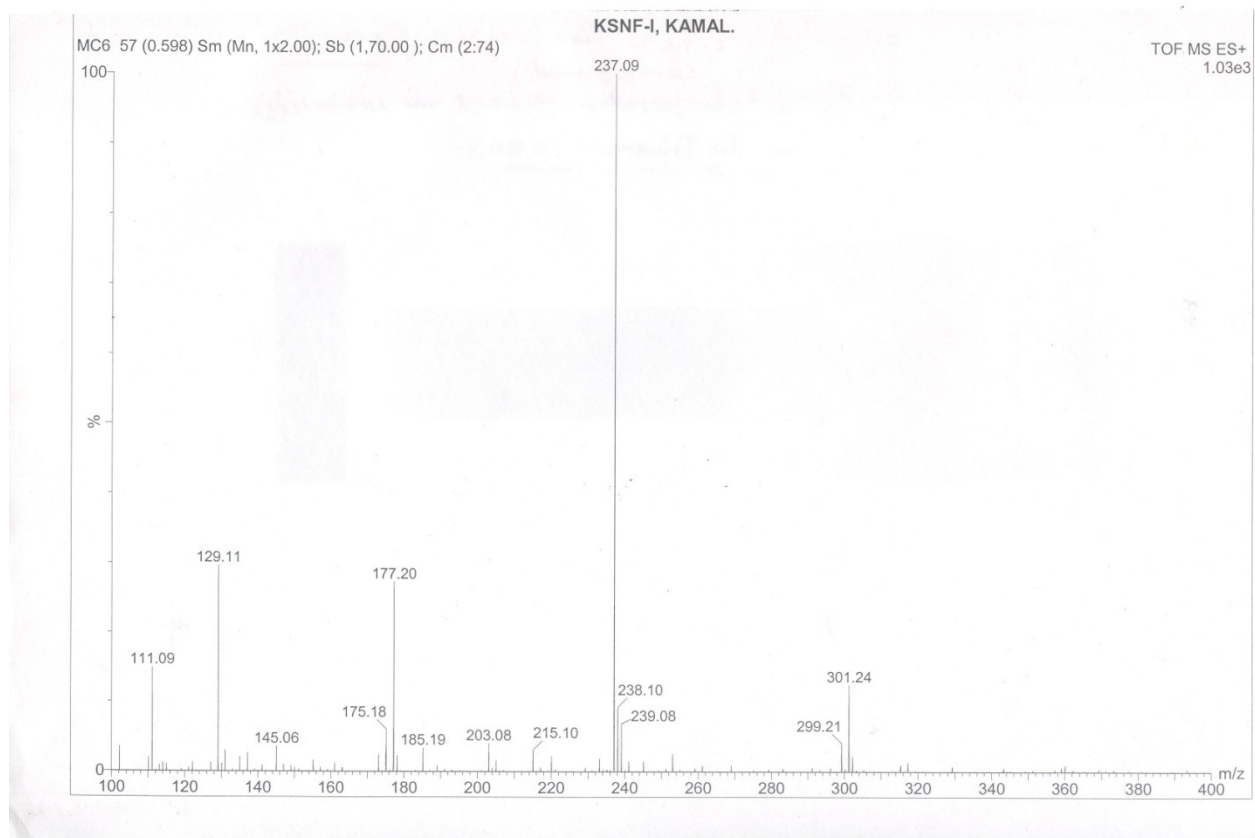

Fig. 4 Mass Spectra of 5-nitrofurfural-2-thiosemicarbazone
